# Supplementary material for: Using pollen DNA metabarcoding to profile nectar sources of urban beekeeping in Kōtō-ku, Tokyo
Source: Research Square preprint supplement (doi:10.21203/rs.3.rs-44772/v2), 2020-10-20
Supplement: Supplementary file 1 [file 5f0ef0a35d8e7a6263f833d3.xlsx]

## Sheet: Table S1
	Table S1 Summary of collection date, sequence summary, and OTU profiling in each sample. The samples of ealry May, early June, mid June, late June, early July, early August, mid September,
	and early October were taken from a single honeycomb on the same day to assess any potential variation in pollen accumulated among different honeycombs.
	Sample label	Abbreviation	Collection date	Sequence data		Number of the representative OTUs	Number of available reads matpped to the representative OTUs [proportion]	Frequency of removed reads
				Sequence ID	Number of raw reads [R1 + R2]			Number of reads not mapped to OTUs [proportion]	Number of reads mapped to the unconcerned OTUs [proportion]
	Mid-March_#1	Mar. M1	2018-03-12	312	24142	1	6,556 [27.156%]	17,510 [72.529%]	76 [ 0.315%]
	Late-March_#1	Mar. L1	2018-03-26	326	156610	9	43,890 [28.025%]	89,894 [57.400%]	22,826 [14.575%]
	Early-April_#1	Apl. E1	2018-04-09	409	22674	2	5,606 [24.724%]	10,388 [45.815%]	6,680 [29.461%]
	Mid-April_#1	Apl. M1	2018-04-20	420	70878	7	33,962 [47.916%]	27,576 [38.906%]	9,340 [13.178%]
	Late-April_#1	Apl. L1	2018-04-30	430B	82172	6	12,088 [14.711%]	58,740 [71.484%]	11,344 [13.805%]
	Early-May_#1	May E1	2018-05-10	510	41320	7	9,154 [22.154%]	29,870 [72.289%]	2,296 [ 5.557%]
	Early-May_#2	May E2	2018-05-10	510B	101590	6	13,582 [13.369%]	82,462 [81.171%]	5,546 [ 5.459%]
	Mid-May_#1	May M1	2018-05-17	517A	97284	3	13,714 [14.097%]	59,902 [61.574%]	23,668 [24.329%]
	Late-May_#1	May L1	2018-05-25	525C	151032	2	106,890 [70.773%]	23,344 [15.456%]	20,798 [13.771%]
	Early-June_#1	Jun. E1	2018-06-07	607	13988	1	12,992 [92.880%]	758 [ 5.419%]	238 [ 1.701%]
	Early-June_#2	Jun. E2	2018-06-07	607C	104994	6	14,346 [13.664%]	83,398 [79.431%]	7,250 [ 6.905%]
	Mid-June_#1	Jun. M1	2018-06-18	618B	138382	1	104,790 [75.725%]	25,860 [18.687%]	7,732 [ 5.587%]
	Mid-June_#2	Jun. M2	2018-06-18	618C	65196	5	14,992 [22.995%]	33,776 [51.807%]	16,428 [25.198%]
	Late-June_#1	Jun. L1	2018-06-29	0629B	29750	5	12,736 [42.810%]	16,294 [54.770%]	720 [ 2.420%]
	Late-June_#2	Jun. L2	2018-06-29	629D	81590	5	23,062 [28.266%]	47,002 [57.608%]	11,526 [14.127%]
	Early-July_#1	Jul. E1	2018-07-10	710	27474	2	24,758 [90.114%]	2,254 [ 8.204%]	462 [ 1.682%]
	Early-July_#2	Jul. E2	2018-07-10	710A	89006	2	84,076 [94.461%]	1,144 [ 1.285%]	3,786 [ 4.254%]
	Early-July_#3	Jul. E3	2018-07-10	710C	92280	5	70,382 [76.270%]	10,986 [11.905%]	10,912 [11.825%]
	Late-July_#1	Jul. L1	2018-07-30	730B	51610	7	36,566 [70.851%]	8,758 [16.970%]	6,286 [12.180%]
	Early-August_#1	Aug. E1	2018-08-09	0809A	32864	3	22,758 [69.249%]	8,258 [25.128%]	1,848 [ 5.623%]
	Early-August_#2	Aug. E2	2018-08-09	809C	80936	5	25,190 [31.123%]	40,918 [50.556%]	14,828 [18.321%]
	Mid-August_#1	Aug. M1	2018-08-20	0820A	38164	3	28,844 [75.579%]	8,426 [22.078%]	894 [ 2.343%]
	Late-August_#1	Aug. L1	2018-08-29	829B	84822	4	14,114 [16.640%]	70,704 [83.356%]	4 [ 0.005%]
	Early-September_#1	Sep. E1	2018-09-07	907	81166	3	17,858 [22.002%]	63,296 [77.983%]	12 [ 0.015%]
	Mid-September_#1	Sep. M1	2018-09-11	0911A	26818	3	24,800 [92.475%]	676 [ 2.521%]	1,342 [ 5.004%]
	Mid-September_#2	Sep. M2	2018-09-11	911B	16590	3	3,930 [23.689%]	5,280 [31.826%]	7,380 [44.485%]
	Mid-September_#3	Sep. M3	2018-09-11	911C	182492	1	169,024 [92.620%]	670 [ 0.367%]	12,798 [ 7.013%]
	Late-September_#1	Seq. L1	2018-09-28	928A	72422	6	57,734 [79.719%]	7,858 [10.850%]	6,830 [ 9.431%]
	Early-October_#1	Oct. E1	2018-10-09	1009A	147382	14	49,454 [33.555%]	86,554 [58.728%]	11,374 [ 7.717%]
	Early-October_#2	Oct. E2	2018-10-09	1009B	157654	31	60,264 [38.225%]	74,296 [47.126%]	23,094 [14.649%]
	Mid-October_#1	Oct. M1	2018-10-16	1016A	191664	29	71,090 [37.091%]	83,924 [43.787%]	36,650 [19.122%]

## Sheet: Table S2
	Table S2 Meteorological observation data in Tokyo on March to October, 2018. The rows with red characters correspond to the collection date of sample.
	Month	Date	Pressure (hPa)		Precipitation (mm)			Temperature (°C)			Humidity (%)		Wind speed (m/s) and Wind direction					Day length (h)	Weather
			Actual place	Sea-level
			Average	Average	Total	Highest		Average	Highest	Lowest	Average	Lowest	Average	Maximum		Maximum instantaneous			Daytime	Nighttime
						60 mins	10 mins						Wind speed	Wind speed	Wind direction	Wind speed	Wind direction		(06:00-18:00)	(18:00-06:00 (next day))
	March	1	990.8	993.7	48	18.5	7.5	12.4	20.3	6.7	63	21	3.2	7.7	West-southwest	15.7	Southwest	7.7	Cloudy, rainy or sunny	Sunny
	March	2	1004.5	1007.5	--	--	--	9.4	14.4	5.4	34	22	3	6.2	Northwest	10.1	West-northwest	10.9	Sunny	Sunny
	March	3	1014.8	1017.8	--	--	--	9.7	16.2	3.2	50	30	2.1	4.8	South-southeast	7.1	Southeast	9.1	Sunny or cloudy	Cloudy or sunny
	March	4	1015.2	1018.1	--	--	--	13.9	21.2	5.8	63	45	3.7	8.4	South	15.1	South	10.4	Sunny	Sunny or cloudy
	March	5	1006.7	1009.6	15.5	4	1.5	15.6	19.9	9.7	87	71	4.9	10	South	20.8	South-southwest	0.4	Cloudy or rainy	Rainy or Cloudy
	March	6	1019.1	1022	3	2.5	1	8.3	12.5	4.4	66	45	3.5	5.2	Northeast	11.2	East	7	Cloudy or sunny	Sunny or cloudy
	March	7	1031.1	1034.2	0	0	0	5.2	8.3	2.8	56	45	2.8	5	Northeast	8.9	East	0.7	Cloudy	Cloudy or rainy
	March	8	1019.8	1022.9	26	4.5	1.5	5.9	9.8	3.6	92	74	2.9	5.4	Northwest	9.2	Northwest	0	Rainy	Rainy
	March	9	1003.8	1006.7	58	14	6	11.6	17.5	6.4	85	56	3.6	9	South-southeast	19.6	South	0	Rainy or Cloudy	Rainy or Cloudy
	March	10	1014.9	1017.9	1.5	1	0.5	7.3	11.8	4.4	67	42	2.8	5.5	North-northwest	9.6	North-northwest	3.8	Cloudy or sunny	Cloudy or sunny
	March	11	1016.3	1019.2	0	0	0	9.2	16.1	5.5	64	44	2.2	4.4	Northwest	8.5	West-northwest	4.4	Cloudy, rainy or sunny	Sunny
	March	12	1018.2	1021.1	--	--	--	9.9	15.9	5.2	50	24	3.4	6	Northwest	13.3	Northwest	11.3	Sunny	Sunny or cloudy
	March	13	1018.6	1021.6	--	--	--	11.6	17.5	5.3	61	43	2.6	5	South	8.7	South-southwest	10.9	Sunny	Sunny
	March	14	1017	1019.9	--	--	--	14.3	21.5	7.2	64	28	2	4.6	Southeast	7	Southeast	10.8	Sunny	Sunny
	March	15	1013.9	1016.8	--	--	--	15.9	22.1	9	65	40	4.1	8.7	South	16.1	South-southwest	7.6	Cloudy or sunny	Sunny or cloudy
	March	16	1009.7	1012.6	4	1.5	1	13.2	17.5	5.7	79	59	4.5	9.3	South-southwest	16.3	South-southwest	0	Rainy or Cloudy	Rainy, Cloudy and sunny
	March	17	1023.3	1026.3	--	--	--	7.4	12.1	3.1	52	32	3.2	6.1	Southeast	10.1	Southeast	11.4	Sunny	Cloudy or sunny
	March	18	1021.4	1024.3	--	--	--	11.3	15.8	5.4	60	42	2.9	6.1	South	12.8	South-southwest	4.1	Cloudy or sunny	Cloudy or sunny
	March	19	1013.3	1016.2	0.5	0.5	0.5	13	18	8.7	70	51	2.1	5.3	South-southwest	9.9	West-southwest	0.2	Cloudy	Rainy
	March	20	1016.1	1019	10	2.5	0.5	8.4	11.1	6.5	85	62	3.7	5.7	Northeast	11.8	North-northeast	0	Rainy or Cloudy	Cloudy
	March	21	1015.4	1018.4	31	4.5	1	3.8	6.6	1.7	88	62	3.1	5.4	Northwest	10	North-northwest	0	Rainy	Rainy
	March	22	995.3	998.2	20	6	2.5	9.5	14.5	4.1	88	55	2.8	5.9	West-northwest	12.5	Northwest	1.8	Cloudy, rainy or sunny	Cloudy
	March	23	1008.8	1011.8	2.5	1.5	0.5	11.9	18.8	7.8	62	30	2.6	5.5	South-southeast	8.1	East	3.6	Cloudy or sunny	Cloudy or rainy
	March	24	1015.7	1018.6	0	0	0	11.3	16.8	7.1	76	45	2.7	6.2	Southeast	10.7	South-southeast	7.1	Cloudy or sunny	Sunny or cloudy
	March	25	1017.1	1020	--	--	--	13	19.3	6.6	62	21	2.7	6	Southeast	10	South-southeast	11.6	Sunny	Sunny
	March	26	1016.6	1019.5	--	--	--	14.1	21.8	8.2	62	33	2.2	4.9	South	7.9	South-southeast	11.5	Cloudy or sunny	Sunny
	March	27	1015.5	1018.3	--	--	--	15.7	22.1	10.1	65	40	2	4.4	Southeast	7.1	Southeast	8.1	Cloudy or sunny	Sunny or cloudy
	March	28	1013.5	1016.3	--	--	--	17.2	22.9	11.1	65	29	2.5	4.9	South	8.4	South-southwest	10.9	Sunny	Sunny
	March	29	1011.3	1014.2	--	--	--	18.1	24.2	12.4	60	30	2.4	5.6	South	7.9	Southeast	10.9	Sunny	Sunny or cloudy
	March	30	1018.1	1021	--	--	--	13.8	18.4	9.6	36	16	4	7.8	South-southeast	13.9	North-northwest	10.8	Sunny	Sunny or cloudy
	March	31	1019.8	1022.8	--	--	--	13.4	18.1	8.3	51	36	3.2	6.2	Southeast	10.2	South-southwest	11	Sunny	Sunny
	April	1	1014.4	1017.3	--	--	--	16	21.9	9.6	65	43	3.7	7.7	South	12.7	South-southwest	9.6	Sunny or cloudy	Cloudy or sunny
	April	2	1013.9	1016.8	--	--	--	17.9	24.5	12.3	70	31	2.6	7.5	Southeast	10.7	Southeast	9.5	Sunny or cloudy	Cloudy
	April	3	1014.4	1017.2	--	--	--	17.9	23.4	14.3	75	54	2.3	5.3	South	9.1	South	8.1	Sunny or cloudy	Sunny
	April	4	1009.1	1012	--	--	--	20.1	26.2	14.7	68	42	3.3	7.9	South-southwest	16	South-southeast	10.8	Sunny or cloudy	Cloudy or sunny
	April	5	1016.5	1019.4	0	0	0	13.3	15.3	11.6	71	46	3.3	7.3	Southeast	12.3	Southeast	0.4	Cloudy	Cloudy or rainy
	April	6	1004.2	1007	1	1	1	18.1	22.4	11.6	82	52	5.3	10.3	South-southwest	22	Southwest	3	Cloudy or rainy	Cloudy or rainy
	April	7	995.6	998.5	0	1	0.5	16.2	21.8	10.2	62	36	4.1	8.7	South	18.7	South	3.8	Cloudy or sunny	Cloudy, rainy or sunny
	April	8	1008.5	1011.4	0	0	0	11.9	16.8	7.2	43	22	2	4.1	North-northwest	9.2	North-northwest	7.3	Sunny	Sunny
	April	9	1012.3	1015.2	--	--	--	13.7	19.9	5.5	42	30	3.7	9.2	South-southwest	16.7	South	11.2	Sunny or cloudy	Sunny
	April	10	1018.7	1021.6	--	--	--	13.6	19.1	8	52	29	3.3	7.8	South-southeast	12.5	South-southeast	11.1	Sunny	Sunny or cloudy
	April	11	1009.5	1012.4	0	0	0	17.6	21.9	12.4	65	48	6.5	12.9	South-southwest	23.2	South-southwest	5.3	Cloudy, sunny or rainy	Cloudy or sunny
	April	12	1006.4	1009.2	--	--	--	19.1	25.9	13.9	58	26	2.4	6.2	East-northeast	11.5	North-northeast	8.4	Cloudy or sunny	Cloudy or sunny
	April	13	1017.2	1020.1	--	--	--	15.5	20.9	11.9	34	18	3.9	7.9	Northwest	13.3	Northwest	11.8	Sunny	Sunny or cloudy
	April	14	1015.5	1018.4	0	0	0	15.2	18.8	11.4	67	55	4	9	South	15.2	South	0.8	Cloudy or rainy	Rainy or Cloudy
	April	15	997.1	1000	19	11.5	2.5	17.9	22.1	13.5	75	37	4.8	10.4	South-southwest	20.9	South	0	Cloudy or rainy	Cloudy
	April	16	1012.7	1015.6	--	--	--	14.7	20	11.7	48	28	3.7	7	North-northwest	13.7	Northwest	4.9	Cloudy or sunny	Cloudy
	April	17	1021.3	1024.2	2.5	1	0.5	12.7	15	11	81	64	2.3	4.1	Northwest	7.6	East	0	Cloudy or rainy	Rainy
	April	18	1013.4	1016.3	28	8	3	12.7	16	10.4	94	69	2.3	4.3	North-northeast	10.9	Northeast	2.4	Rainy or Sunny	Sunny or cloudy
	April	19	1013.5	1016.3	--	--	--	16.2	22.2	10.2	77	53	3.3	7	South-southeast	12.3	Southeast	9	Sunny or cloudy	Sunny
	April	20	1014.8	1017.7	--	--	--	18.7	26.4	12.3	61	23	3	7.3	Southeast	13.7	South-southeast	12	Sunny	Sunny
	April	21	1016.8	1019.7	--	--	--	18.9	26	12.8	65	44	2.8	6.3	South	10.4	South-southeast	12.2	Sunny	Sunny
	April	22	1014.4	1017.3	--	--	--	20.5	28.3	13.9	67	27	2.1	4.3	South-southeast	7.2	Southeast	12.1	Sunny or cloudy	Sunny or cloudy
	April	23	1017.7	1020.6	0	0	0	16.5	18.7	15.1	80	67	3	4.9	East-southeast	8.3	East-southeast	0	Cloudy	Cloudy
	April	24	1010.9	1013.8	1.5	1	0.5	18	21.3	15.4	84	63	3.3	8	South	13.8	South	0	Cloudy or rainy	Rainy or Cloudy
	April	25	998.6	1001.4	57	17.5	3.5	19	22.5	16.6	95	75	3.5	7.8	South-southeast	15.4	South	1.9	Rainy, cloudy or sunny	Cloudy, rainy or sunny
	April	26	1006.9	1009.8	0	0	0	18.9	25	14.8	55	21	3.9	7.4	South-southeast	15	Northwest	9.9	Sunny or cloudy	Cloudy
	April	27	1006.9	1009.8	--	--	--	18.5	22	15.1	70	50	2.9	5.6	Southeast	9	South-southeast	2.7	Cloudy	Sunny
	April	28	1009.8	1012.7	--	--	--	20.1	26.1	15.2	51	17	4.4	8.1	South	14.3	Northwest	12.3	Sunny	Sunny
	April	29	1014.1	1017	--	--	--	20.1	25.6	14	66	36	4.4	8	South	14.8	South	12.1	Sunny	Sunny
	April	30	1012.9	1015.8	--	--	--	20.8	25.7	16.7	65	48	4.5	8.5	South-southeast	13.7	South-southwest	9.2	Sunny or cloudy	Sunny or cloudy
	May	1	1012.6	1015.5	--	--	--	22.3	28.1	16.7	59	28	2.9	6.2	South-southeast	10	South	12.1	Sunny or cloudy	Cloudy or sunny
	May	2	1009.7	1012.6	3.5	2	0.5	20.4	25.3	17.1	79	38	3.2	5.9	South-southwest	12	South	2.9	Cloudy or rainy	Rainy or Cloudy
	May	3	996.7	999.5	14	4.5	1.5	21.9	27.4	16.8	77	49	6.2	10.3	South	19	South-southwest	1.9	Cloudy or rainy	Cloudy or sunny
	May	4	1004.5	1007.3	0	0	0	18	23.8	13.2	55	23	3.8	7.9	North-northwest	15.8	Southwest	9.7	Sunny	Sunny
	May	5	1011.4	1014.3	--	--	--	18.3	24.3	11.5	53	30	3.3	6.8	Southeast	10.5	South	12.4	Sunny	Cloudy or sunny
	May	6	1009.5	1012.3	0	0	0	21	26.5	14.4	55	31	4.5	10	South-southwest	18.6	South-southwest	10.1	Cloudy or sunny	Cloudy or rainy
	May	7	1004	1006.8	21	10	2.5	17.9	21.6	13.9	83	63	4.3	7.6	South-southwest	15.5	South-southwest	0.1	Cloudy or rainy	Rainy or Cloudy
	May	8	1010.6	1013.5	10.5	2.5	0.5	12.9	14.6	11.4	92	73	3.1	5.7	North-northeast	10	Northeast	0	Cloudy or rainy	Rainy
	May	9	1013	1015.9	35	6.5	1.5	12.1	14.3	10.3	90	72	2.9	5	North-northwest	9.9	North-northeast	0	Rainy or Cloudy	Cloudy or rainy
	May	10	1015.1	1018	9	6.5	2	12.1	15.8	10	84	58	1.8	4	West-northwest	5.9	North	3.2	Cloudy, rainy or sunny	Sunny or cloudy
	May	11	1015.4	1018.3	--	--	--	16.4	22.4	9	64	45	3.7	8	South	12.7	South	11.9	Sunny or cloudy	Cloudy or sunny
	May	12	1012.8	1015.7	--	--	--	18.8	24.6	12.9	73	49	2.8	5.6	South-southeast	8.1	South-southeast	9.7	Cloudy or sunny	Cloudy
	May	13	1007.2	1010	49	16	4	17.9	21.4	14.6	85	65	3.4	5.5	South-southwest	10.2	Southwest	0	Cloudy or rainy	Rainy or Cloudy
	May	14	1003.3	1006	0	0.5	0	21.1	28.6	15.2	55	24	2.9	8.4	North-northwest	17.8	North-northwest	10.9	Sunny or cloudy	Sunny
	May	15	1009.2	1012	--	--	--	22.3	28.4	14.8	57	35	3.6	7.8	South	13.2	South	12.6	Sunny	Sunny
	May	16	1008.2	1011	--	--	--	23.5	29	18.8	59	43	4.3	7.3	South	12.2	Southwest	11.3	Cloudy or sunny	Cloudy
	May	17	1003.9	1006.7	0	0	0	24	28.4	21.4	71	55	3.7	6.9	South-southwest	12.8	South-southwest	5.8	Cloudy	Sunny or cloudy
	May	18	1002.4	1005.2	--	--	--	23.4	27.1	20	82	64	3	7	South-southeast	10.7	South-southeast	9.7	Sunny or cloudy	Cloudy or rainy
	May	19	1000.4	1003.2	0	0	0	21.5	26.3	15.3	70	38	3.9	8.6	South	15.7	South-southwest	2.3	Cloudy or sunny	Sunny
	May	20	1015.3	1018.2	--	--	--	16.8	22.1	13.1	51	28	3.5	6.3	Northwest	15.4	Northwest	11	Sunny	Cloudy
	May	21	1017	1019.8	--	--	--	20.3	27.2	13.7	48	20	2.4	4.9	South	7.6	North-northeast	11	Cloudy	Cloudy or sunny
	May	22	1015.6	1018.4	--	--	--	21	27.3	15	55	22	3.1	5.6	Southeast	9.3	Southeast	13.4	Sunny	Sunny or cloudy
	May	23	1007.4	1010.3	9	2.5	1	18.6	22	17	85	55	2.3	4.5	South-southeast	7.4	Northwest	1.3	Cloudy or rainy	Rainy or Cloudy
	May	24	1001.6	1004.4	6	4	1	20.7	25.7	16.1	82	56	2.8	5.1	Northwest	8.1	Southwest	7.8	Sunny or cloudy	Sunny or cloudy
	May	25	1003.8	1006.5	--	--	--	22.8	27.1	18.7	72	51	3.7	8	South-southeast	14.3	South	8.3	Cloudy or sunny	Cloudy or sunny
	May	26	1006.6	1009.4	--	--	--	21.4	25.2	18	63	43	2.7	4.6	Northeast	8.8	North-northeast	2.7	Cloudy	Cloudy or sunny
	May	27	1008.1	1011	--	--	--	21.3	26.9	16.2	72	46	2.9	5.8	South-southeast	10.7	South-southeast	11.2	Sunny or cloudy	Cloudy
	May	28	1010.4	1013.2	--	--	--	21.6	26	18.8	76	58	2.5	4.9	South	8.6	South	0.7	Cloudy	Cloudy or sunny
	May	29	1012.2	1015	--	--	--	23	27.6	19.3	73	50	3.2	6.5	South	10.7	South-southwest	3.6	Cloudy	Cloudy
	May	30	1010.7	1013.5	8.5	2.5	1	21.1	25	17.4	86	63	2.6	5.1	Northwest	7.6	Northwest	0.1	Cloudy or rainy	Rainy or Cloudy
	May	31	1003.5	1006.3	0	0	0	19.5	22	16.5	87	70	2.4	5.5	Northwest	8.5	Northwest	1.6	Cloudy or rainy	Cloudy or sunny
	June	1	1007.5	1010.3	0	0	0	21.7	27.5	17.3	57	33	3.4	6.4	Southeast	10.6	North-northeast	9.1	Sunny	Sunny, cloudy or rainy
	June	2	1013	1015.8	--	--	--	21.9	27.2	16.9	65	44	2.4	5.4	South-southeast	8.8	Southeast	9.9	Sunny	Sunny
	June	3	1013.9	1016.7	--	--	--	22.5	28.6	17.3	68	28	2.8	6	Southeast	9.2	South-southeast	9.8	Sunny	Cloudy or sunny
	June	4	1012.8	1015.6	--	--	--	23.5	29.1	18.5	64	33	2.8	6.1	South-southeast	9.4	South-southeast	13.2	Sunny	Sunny
	June	5	1011.8	1014.6	0	0	0	23.2	28.3	18.2	69	36	2.3	4.8	Southwest	7.6	Southwest	6	Cloudy or sunny	Cloudy or rainy
	June	6	1010.3	1013.1	12.5	2.5	0.5	20.3	22.8	18.3	92	67	1.7	3.7	South-southwest	5	North-northwest	0	Rainy	Rainy or Cloudy
	June	7	1010.3	1013.1	1.5	1.5	0.5	22.2	27.3	18.2	81	52	2.6	6.2	South	9.1	South	8.5	Cloudy or sunny	Sunny or cloudy
	June	8	1005.1	1007.9	1	1	0.5	23.7	27.5	19.3	79	62	4	7.8	South-southwest	13	South-southwest	7.3	Cloudy or sunny	Cloudy or rainy
	June	9	1001.2	1003.9	0	1	0	25.7	32	21.2	74	36	2.7	6.2	Southeast	11.5	South-southeast	8.4	Cloudy or sunny	Cloudy or rainy
	June	10	1006.8	1009.6	31	8	3.5	20	22	18.6	91	76	3	6.5	East-northeast	11	East-northeast	0	Rainy or Cloudy	Rainy
	June	11	994.7	997.5	50	7.5	1.5	18.9	19.9	18.1	99	86	2.9	4.7	Northwest	10.4	North-northwest	0	Rainy	Cloudy or rainy
	June	12	993	995.8	0	0	0	20.5	26.4	17.8	91	71	2.2	4.7	Northeast	8.2	North-northeast	1.1	Cloudy	Cloudy
	June	13	1000.2	1003	--	--	--	21.5	27	18.3	77	51	2.7	5.2	South-southeast	7.7	South-southwest	5	Cloudy or sunny	Sunny or cloudy
	June	14	1007.2	1010	0	0	0	20.6	25.2	18.6	72	54	3.4	7	Southeast	10.1	Southeast	1.3	Cloudy	Cloudy
	June	15	1006.7	1009.5	9.5	6	3	17.6	20	15.4	93	83	3.2	5.6	North-northeast	11.5	North-northeast	0	Rainy or Cloudy	Rainy or Cloudy
	June	16	1010.4	1013.3	3	2	1	15.9	18.4	14.2	86	72	2.8	5.1	North-northeast	12.2	North-northeast	0.1	Cloudy or rainy	Cloudy
	June	17	1013.2	1016.1	0	0	0	18.7	22.5	15.1	77	58	2.3	4.7	Southeast	7.5	South-southeast	0.4	Cloudy	Cloudy
	June	18	1009.5	1012.3	2	1	0.5	19.4	21.2	17.7	93	79	1.9	3.8	West-northwest	5.8	North-northwest	0	Cloudy or rainy	Cloudy or rainy
	June	19	1006.4	1009.2	0	0	0	22.7	28.8	18.2	77	49	3	5.8	South-southeast	9.6	Southeast	7.7	Cloudy or sunny	Cloudy or rainy
	June	20	1001.5	1004.3	24.5	6.5	2	20.8	21.7	19.4	98	84	2.7	5.8	Southeast	10.6	South-southeast	0	Rainy	Rainy or Cloudy
	June	21	999.4	1002.2	2	1.5	0.5	21.2	24.4	19	95	79	2	4.4	South-southeast	7.8	Southeast	0	Cloudy	Sunny or cloudy
	June	22	1004.6	1007.4	--	--	--	23.1	28.1	19.4	79	57	2.7	6.4	Southeast	9.7	Southeast	10.8	Cloudy or sunny	Cloudy or sunny
	June	23	1003.8	1006.6	16	9.5	2.5	20.6	23	17.9	95	81	1.7	4.8	South	6.8	South	0	Cloudy or rainy	Cloudy or rainy
	June	24	1002.5	1005.2	2.5	1	0.5	21.3	27	18.4	91	64	2.1	3.8	South	6.1	South	4.1	Rainy, cloudy or sunny	Cloudy
	June	25	1008.3	1011.1	--	--	--	26.2	32.6	19.7	71	40	2.4	5.4	Southeast	8.2	Southeast	12.9	Sunny	Sunny or cloudy
	June	26	1011	1013.8	--	--	--	25.7	30.1	22.3	75	56	3.6	8.1	South	12.4	South-southwest	9.2	Sunny or cloudy	Cloudy
	June	27	1003.1	1005.8	0	0	0	27.7	31.7	24.9	71	57	7	11.2	South-southwest	20	Southwest	7.6	Cloudy or sunny	Cloudy or sunny
	June	28	1003.1	1005.9	0	0	0	27.4	31.9	25.2	77	60	6	8.4	South	16.1	South-southwest	4.8	Cloudy or rainy	Sunny
	June	29	1008.3	1011	--	--	--	28.2	32.9	25.4	73	55	6.9	9.4	South	16.9	South-southwest	12.8	Sunny	Sunny
	June	30	1014	1016.8	--	--	--	28.6	32.7	25.2	74	57	5.8	9.3	South	15.5	South-southeast	13.1	Sunny or cloudy	Sunny or cloudy
	July	1	1015.4	1018.2	--	--	--	28.1	32	25.4	75	63	5.1	8.1	South-southwest	15	South-southwest	13.1	Sunny	Sunny
	July	2	1011.3	1014	--	--	--	28.8	33.5	24	70	54	3.7	6.7	South	10.9	South	13.6	Sunny	Sunny
	July	3	1006	1008.7	--	--	--	28.4	32.7	25.6	69	51	5	8.2	South	15	South	11.4	Cloudy	Cloudy or rainy
	July	4	1001.6	1004.3	0	0	0	27.6	31.2	25.5	75	64	6.6	9.6	South-southwest	18.3	South-southwest	2.6	Cloudy or rainy	Cloudy or rainy
	July	5	1001.9	1004.6	2	1	0.5	26.7	28.7	24.8	79	70	6.9	11.1	South-southwest	19.8	South-southwest	0.1	Rainy or Cloudy	Rainy or Cloudy
	July	6	1007.7	1010.5	28.5	7	3	21.7	25	19.1	99	92	3.1	6.4	South	12	South-southwest	0	Rainy or Cloudy	Rainy or Cloudy
	July	7	1009.9	1012.6	0	0	0	25	29.6	19.3	86	69	3.8	7.5	South	13.2	South	3.1	Cloudy	Cloudy
	July	8	1012.9	1015.7	--	--	--	27.4	32.2	24.5	79	58	3.9	6	South-southeast	10.1	Southeast	6.8	Cloudy	Sunny or cloudy
	July	9	1015.9	1018.7	3.5	3.5	1.5	27.3	31.6	24.2	86	68	3.2	6.5	South	10.6	South	5.1	Sunny, cloudy or rainy	Sunny or cloudy
	July	10	1015	1017.8	--	--	--	28.5	32.8	25.4	78	58	3.7	7.5	Southeast	11.7	Southeast	10.5	Sunny or cloudy	Cloudy or sunny
	July	11	1011.6	1014.3	0	0	0	29	34.2	25.2	75	59	2.1	5	Southeast	9.9	Northeast	5.5	Cloudy	Cloudy or rainy
	July	12	1010.2	1012.9	3.5	2	1	26.6	30	23.1	83	68	2.6	6.2	Southeast	10.4	Northeast	3.9	Cloudy, rainy or sunny	Cloudy
	July	13	1006.8	1009.5	--	--	--	29.1	33.8	25.5	75	56	2.7	5.6	Southeast	8.5	Southeast	8.7	Cloudy	Sunny or cloudy
	July	14	1007.6	1010.3	--	--	--	30.1	35.4	26.2	70	48	2.8	7	Southeast	10.3	Southeast	8.9	Sunny or cloudy	Sunny or cloudy
	July	15	1009	1011.7	--	--	--	29.7	34.5	26.3	78	55	3.2	6.7	Southeast	10.1	South-southeast	11.1	Sunny	Sunny or cloudy
	July	16	1008.7	1011.4	--	--	--	29.9	34.4	26.3	78	63	3	6.8	South	10.7	South	11.1	Cloudy	Cloudy
	July	17	1008	1010.7	--	--	--	29.9	34.8	26.9	78	64	3.4	6.6	Southeast	9.8	South-southeast	10.2	Cloudy or sunny	Cloudy or sunny
	July	18	1007.2	1009.9	--	--	--	30.5	35.3	26.7	75	58	3	5.2	South-southeast	8.6	Southeast	11.2	Sunny	Sunny
	July	19	1007.6	1010.3	--	--	--	29.9	34.8	26.6	78	58	3.6	6.3	Southeast	10.4	Southeast	11.2	Sunny or cloudy	Sunny or cloudy
	July	20	1008.3	1011	--	--	--	29.9	34.2	27	75	58	4.4	7.3	South-southeast	11.6	South-southeast	12.5	Sunny	Sunny
	July	21	1007.7	1010.4	--	--	--	30.5	34.9	26.9	72	59	3.2	6.7	Southeast	9.9	South-southeast	12.6	Sunny or cloudy	Cloudy or sunny
	July	22	1005.5	1008.2	--	--	--	31	35.6	26.6	73	57	2.4	5.2	Southeast	7.7	South-southeast	9.9	Cloudy or sunny	Cloudy
	July	23	1002.7	1005.4	--	--	--	32.2	39	28.5	59	32	2.9	7.3	South-southeast	11.3	Southeast	10	Cloudy or sunny	Sunny or cloudy
	July	24	1003.7	1006.4	2.5	2.5	1.5	29.8	35.3	26.3	76	53	2.8	5.3	Southeast	8.2	South-southeast	7.9	Sunny or cloudy	Cloudy or rainy
	July	25	1006.3	1009	0	2.5	0	28.1	32.2	25.7	81	64	3	6.4	Southeast	9.7	East-southeast	3.3	Cloudy	Cloudy
	July	26	1007.1	1009.9	0	0	0	26.5	30.7	24.3	68	53	2.9	4.3	Southeast	7.9	East	3.1	Cloudy or sunny	Cloudy or sunny
	July	27	1006.3	1009	0	0	0	25.4	28.5	23.5	69	57	3.1	5.4	North-northeast	9.3	Northeast	2.9	Sunny or cloudy	Cloudy or rainy
	July	28	1000.1	1002.9	52	16	5	24	28	20.1	96	73	4.2	7.9	North-northeast	19.3	North-northeast	0.2	Rainy or Cloudy	Rainy or Cloudy
	July	29	1002.8	1005.5	15	10	4.5	27.9	32.3	25.4	85	64	3.6	6.3	Southeast	11.1	Southeast	5.9	Sunny or cloudy	Sunny or cloudy
	July	30	1006.1	1008.8	0	0	0	28	31.9	25	82	63	2.6	6	east-southeast	9.4	East	2.6	Cloudy or sunny	Cloudy or sunny
	July	31	1003.6	1006.3	--	--	--	28.4	33.8	24.4	79	51	2.6	4.7	South-southwest	7.2	South-southeast	8.2	Sunny or cloudy	Sunny
	August	1	1000.6	1003.3	--	--	--	30.3	35.1	24.8	73	50	2.6	6.1	Southeast	8.7	South-southeast	12.5	Sunny	Sunny
	August	2	1002	1004.7	0	0	0	31.2	37.3	26.7	70	39	2.5	5.7	Southeast	8.2	Southeast	8.3	Sunny or cloudy	Cloudy or sunny
	August	3	1003.3	1006	0	0	0	30.5	35.4	27.3	74	55	2.6	7.8	South-southeast	11.3	South-southeast	6.4	Sunny	Sunny or cloudy
	August	4	1004.3	1007	--	--	--	29.8	34.1	26.1	72	53	2.8	6.1	Southeast	9.4	South-southeast	11.1	Sunny or cloudy	Sunny or cloudy
	August	5	1001.6	1004.3	--	--	--	30.4	34.7	27.2	77	61	3.3	6.4	South-southeast	10.6	Southeast	9.9	Sunny	Sunny or cloudy
	August	6	1001.5	1004.2	0	0	0	28.7	34	25	80	63	3	5.8	East-northeast	10.2	North-northeast	5.2	Cloudy or sunny	Cloudy or rainy
	August	7	1005.2	1008	4.5	1.5	1	22.2	25	20.8	93	78	3.3	5.5	Northeast	9.2	Northeast	0	Rainy or Cloudy	Cloudy or rainy
	August	8	997.6	1000.3	41	5	2	23.6	25.1	21.6	95	81	3.9	5.9	North-northwest	13.4	North	0	Rainy	Rainy
	August	9	994.2	996.9	4	1.5	0.5	27.4	32.1	23.8	85	67	5	8.3	Northwest	14.8	Northwest	1.9	Cloudy or sunny	Sunny
	August	10	998.8	1001.5	--	--	--	29.8	34.5	27	76	61	3.8	6.5	South-southeast	11	South	10.7	Sunny or cloudy	Cloudy or sunny
	August	11	1001.8	1004.5	0.5	0.5	0.5	28.7	33.6	26	85	63	2.3	5.7	South-southeast	8.9	Southeast	5.4	Cloudy, sunny or rainy	Cloudy or rainy
	August	12	1007.2	1009.9	0	0	0	27.7	31.1	25.6	85	69	2.2	4.4	Northeast	8.7	East-northeast	0.4	Cloudy	Cloudy or rainy
	August	13	1008.8	1011.6	10.5	9.5	6	27.5	34.1	24.6	91	64	2	6	Northwest	8.9	West-northwest	4.6	Sunny or rainy	Sunny or cloudy
	August	14	1010.2	1012.9	--	--	--	28.8	34.1	23.9	79	61	3.8	7.7	South	14.3	South	10.8	Cloudy or sunny	Sunny or cloudy
	August	15	1010.1	1012.8	--	--	--	29.7	33.1	27.2	72	59	5.8	9.5	South	18	South-southwest	11.8	Cloudy	Cloudy or sunny
	August	16	1003.4	1006.1	0	0	0	29.1	32.3	25.8	72	60	5.9	10.2	South-southwest	20.3	South-southwest	6.3	Cloudy	Cloudy or rainy
	August	17	1004.9	1007.7	0	0	0	26.3	30	21.3	44	29	5.5	10.4	Northwest	18.3	West-northwest	10.5	Sunny	Sunny or cloudy
	August	18	1010.4	1013.2	--	--	--	22.7	27.2	18.3	57	40	2.9	5.9	South-southeast	9.1	Southeast	11.5	Cloudy or sunny	Cloudy or sunny
	August	19	1012	1014.8	--	--	--	23.6	28.6	19.4	66	44	2.5	5.9	South-southeast	8.9	South-southeast	9.1	Cloudy or sunny	Cloudy
	August	20	1010.8	1013.6	0	0	0	24.7	27.6	20.9	74	60	1.7	3.5	Northwest	5.7	East-northeast	0.3	Cloudy or rainy	Cloudy
	August	21	1009.5	1012.3	0	0	0	28.2	33.6	23.7	80	55	3.5	7.1	South	11.7	Southeast	8.3	Cloudy or sunny	Sunny or cloudy
	August	22	1010.9	1013.6	0	0	0	29.7	34.1	26.9	75	58	4.9	8.5	South	13.4	South-southwest	11.8	Sunny	Sunny
	August	23	1011.4	1014.1	0	0	0	29.4	33.7	26.2	78	61	4.8	9.5	South-southeast	16.5	South-southeast	5.9	Sunny or cloudy	Cloudy or rainy
	August	24	1007.1	1009.8	7.5	4	2.5	28.2	31.4	26.3	84	72	7.4	11	South-southeast	20.1	Southeast	2.9	Rainy or Cloudy	Cloudy
	August	25	1006.7	1009.4	--	--	--	31.1	35.6	27.6	70	54	4.3	7.5	South-southwest	13.6	South-southwest	11.6	Sunny	Sunny
	August	26	1007.5	1010.2	--	--	--	31	36	26.4	72	52	2.1	4.5	South	7.5	East	12.2	Sunny	Sunny
	August	27	1008.9	1011.7	16	16	7	29.4	35.8	24.5	74	47	2.9	7.3	Southeast	11.7	Southeast	9.8	Sunny or cloudy	Cloudy or rainy
	August	28	1009.4	1012.2	1	1	0.5	26.6	30.5	23.5	84	67	2.3	5	Southeast	7.9	South-southeast	1.9	Cloudy	Cloudy
	August	29	1010.1	1012.9	0.5	0.5	0.5	26.1	29.2	24.1	86	72	2.4	4.8	Southeast	7.5	South-southeast	0.6	Cloudy	Cloudy or rainy
	August	30	1008.2	1011	0	0	0	28.8	34	25	77	55	2.9	5.6	South	9.2	South-southwest	6.1	Sunny or cloudy	Cloudy or sunny
	August	31	1005.3	1008	1	1	1	28.7	35.4	25.1	77	51	2.5	6.1	Southeast	11.3	Northeast	9.6	Cloudy, sunny or rainy	Cloudy, sunny or rainy
	September	1	1006	1008.7	6	3.5	3	25.9	31.4	21	86	66	2.5	5.7	East-northeast	9.7	Northeast	0.9	Cloudy or rainy	Cloudy or rainy
	September	2	1010.9	1013.7	7.5	3.5	2	22.1	23.7	20.7	95	87	2	4.3	Northeast	8.8	North-northeast	0	Rainy or Cloudy	Cloudy or rainy
	September	3	1008.8	1011.6	4	3.5	1.5	23.6	26.1	22	95	83	1.8	3.7	Southeast	5	Southeast	1.4	Rainy, cloudy or sunny	Cloudy, sunny or rainy
	September	4	1001.4	1004.1	14.5	8	5	26.5	28.7	22.8	90	75	5.9	12.9	South	26.8	South	0	Cloudy or rainy	Cloudy or rainy
	September	5	999.1	1001.8	8.5	6.5	3.5	27.6	32	22.5	75	56	6.6	10.4	South-southwest	20.6	South-southwest	9.1	Sunny or cloudy	Cloudy or sunny
	September	6	1004.6	1007.3	--	--	--	27.6	31.5	24.8	67	49	3.7	6.1	South	11.5	South-southwest	6.2	Cloudy or sunny	Cloudy or rainy
	September	7	1006.3	1009	0	0	0	27.5	30.4	24.9	75	65	5.4	8.7	South	18	South-southwest	1.4	Cloudy or rainy	Sunny or cloudy
	September	8	1008.6	1011.4	0	0	0	28.8	33	26.3	74	57	5.3	8.6	Southwest	15.6	South-southwest	10.3	Sunny or cloudy	Cloudy or sunny
	September	9	1011.6	1014.4	--	0	--	28.3	32.1	26.1	76	52	4.9	8.2	South	14.4	South	8.1	Sunny or cloudy	Cloudy or sunny
	September	10	1010.7	1013.4	38.5	15	4	25.5	30.6	21.4	89	66	3.6	7.8	South-southeast	12	South-southeast	3.5	Cloudy or rainy	Rainy or Cloudy
	September	11	1017.3	1020.1	4	3.5	2	21.4	23.9	19.3	81	66	3.7	5.5	East-northeast	10.8	Northeast	0.3	Cloudy	Cloudy or sunny
	September	12	1020.4	1023.3	0	0	0	21	24.4	18.1	70	54	2.9	5.1	East-northeast	10	North-northeast	3.3	Cloudy	Cloudy, rainy or sunny
	September	13	1017.8	1020.6	0	0	0	22.4	27.3	18.5	78	57	2.1	4.3	Southeast	7.3	North-northwest	4.3	Cloudy or sunny	Rainy or Cloudy
	September	14	1016.3	1019.1	7.5	3	1	21.9	24.9	19.9	93	69	2	3.8	Northwest	5.8	South	0.2	Cloudy or rainy	Rainy or Cloudy
	September	15	1012.9	1015.7	14.5	3.5	1.5	20.5	22.2	19.1	100	93	1.5	3.6	North-northeast	6.4	North-northeast	0	Rainy or Cloudy	Cloudy
	September	16	1010.2	1013	0	0	0	23.1	27.4	20.1	89	69	1.8	3.6	South	5.8	South-southeast	4.1	Cloudy or sunny	Sunny or cloudy
	September	17	1008.6	1011.4	26	22.5	9.5	24.7	31.2	21.1	86	54	2.3	6.5	Southeast	10.3	South-southeast	6.8	Cloudy, sunny or rainy	Rainy or Cloudy
	September	18	1011.2	1014	40.5	38.5	16.5	23.3	28.1	20.3	88	59	2.7	6.3	Southeast	10.3	South-southeast	6.8	Sunny or cloudy	Rainy or Cloudy
	September	19	1011.7	1014.5	0	1.5	0	22.2	27.4	18.2	72	38	2.8	5.8	Southeast	8.9	Southeast	8	Sunny	Cloudy or sunny
	September	20	1012.5	1015.3	40.5	20	7	19.9	24	15.4	85	62	2.1	4.4	North-northeast	8.4	North-northeast	0	Rainy or Cloudy	Rainy
	September	21	1010.2	1013.1	36	6	2	17.7	19	15.6	100	100	3.5	5	Northwest	9.8	North-northwest	0	Rainy	Cloudy or rainy
	September	22	1007	1009.8	0	0	0	21.5	25.8	18.7	95	71	1.2	2.9	Northwest	4.9	North-northeast	3.1	Cloudy or rainy	Cloudy or sunny
	September	23	1013.3	1016.1	0	0	0	24.5	28.4	21.8	77	51	2.3	6	Southeast	10	South-southeast	5	Cloudy or sunny	Cloudy
	September	24	1012.3	1015.1	1.5	1.5	1.5	24.4	28.6	21.2	84	70	2	3.9	East	6.7	East	2.3	Cloudy or rainy	Cloudy or sunny
	September	25	1011.9	1014.7	14.5	6	2.5	21.3	25.2	18.6	95	81	2.5	5.1	Northeast	10.3	Northeast	0	Rainy or Cloudy	Rainy or Cloudy
	September	26	1014.6	1017.5	38.5	12	3	17.7	19.9	15.7	96	79	2.5	4.7	Northwest	8.4	North-northwest	0	Cloudy or rainy	Rainy
	September	27	1010.8	1013.7	19	9	3	15.9	17.5	14.7	99	93	2.9	5.5	North-northwest	10.6	Northwest	0	Rainy or Cloudy	Sunny or cloudy
	September	28	1014.2	1017	--	--	--	19.7	26	14.1	77	39	2.1	6.7	Southeast	10.7	Southeast	11.4	Sunny	Sunny or cloudy
	September	29	1016.8	1019.7	9.5	2.5	1	18.8	21.3	17.2	95	77	2.1	3.6	West-northwest	5.6	North-northwest	0	Rainy or Cloudy	Rainy or Cloudy
	September	30	1002.2	1005	34	7.5	4.5	20.4	27	16.9	97	82	3.5	11.7	South-southeast	26.4	South-southwest	0.2	Rainy or Cloudy	Cloudy or rainy
	October	1	991.5	994.2	18	19	8.5	26.1	32.3	20.4	62	35	6.1	18.2	South	39.3	South	10.7	Sunny or cloudy	Sunny
	October	2	1009.7	1012.5	--	--	--	22	26.9	17.5	56	33	2.9	5.6	Southeast	8.8	Northwest	10.7	Sunny	Sunny or cloudy
	October	3	1017.2	1020	--	--	--	21	23.3	18.1	77	66	2.3	4	Northwest	6.6	East-northeast	0.7	Cloudy	Cloudy
	October	4	1023.3	1026.2	0	0	0	20.1	21.4	18.7	78	63	2.4	4.3	North-northeast	7.1	North-northeast	0	Cloudy or rainy	Cloudy or rainy
	October	5	1022.9	1025.8	9.5	3.5	1.5	18.7	20.1	17.8	95	76	2.4	4	North-northwest	7.1	North-northeast	0	Rainy	Rainy or Cloudy
	October	6	1012.5	1015.3	--	0	--	23.7	29.3	18.4	89	68	3.4	7.6	South	14.7	South	7.3	Sunny or cloudy	Sunny or cloudy
	October	7	1005.2	1008	--	--	--	27.5	32.3	23.9	65	42	4.4	9.8	South	18.1	Southwest	10.7	Sunny	Cloudy or sunny
	October	8	1011.8	1014.6	0	0	0	21.9	24.1	18.7	73	65	2.7	5	East-northeast	8.3	North-northeast	0	Cloudy or sunny	Sunny or cloudy
	October	9	1012.8	1015.6	--	--	--	21.9	26.4	17.9	76	57	2.2	4.3	East-northeast	7	Northeast	5.7	Sunny or cloudy	Sunny or cloudy
	October	10	1012.8	1015.6	0.5	0.5	0.5	22.4	26.4	18.7	79	52	2.4	5.3	Southeast	7.5	Southeast	5.9	Cloudy or sunny	Cloudy or rainy
	October	11	1010.7	1013.5	1	1.5	0.5	21.7	23.7	19.7	93	86	2	3.8	Northwest	6.4	South	0	Cloudy	Cloudy or rainy
	October	12	1014	1016.8	0	0	0	20	22.5	18.4	77	62	2.8	5.4	Northwest	8.7	Northwest	0.3	Cloudy or rainy	Cloudy
	October	13	1020.6	1023.5	0	0	0	17.4	18.5	15.6	65	55	2.6	5.1	East-northeast	9.3	North-northeast	0	Cloudy	Cloudy or rainy
	October	14	1018	1020.9	7.5	3.5	1	16.4	19.6	13.2	85	66	2.3	5	Northwest	7.8	Northwest	1	Cloudy or rainy	Cloudy or sunny
	October	15	1015.8	1018.7	0.5	0.5	0.5	18.1	21.1	16.2	81	62	1.5	3.5	North-northeast	5.4	North-northeast	0.5	Cloudy or rainy	Cloudy, rainy or sunny
	October	16	1010.9	1013.7	0	0	0	18.4	21.2	15.5	79	59	2.1	4	Northeast	6.5	North	2.1	Cloudy	Cloudy or rainy
	October	17	1008.6	1011.4	1	1	0.5	18.2	22.3	14.9	77	54	2.5	4.7	East-northeast	8.9	North-northeast	4.2	Cloudy or sunny	Cloudy or sunny
	October	18	1013.6	1016.5	--	--	--	17.2	21.7	13.7	73	54	2.6	4.7	Northeast	8.1	Northeast	3.8	Sunny or cloudy	Sunny, cloudy or rainy
	October	19	1015.2	1018.1	0.5	0.5	0.5	16.6	20.1	14.3	79	65	2.5	4.5	Northwest	8.1	North-northwest	0.6	Cloudy or rainy	Sunny or cloudy
	October	20	1014.9	1017.7	9	5.5	2	16.6	22	13	79	49	2.8	5.5	North-northwest	12.9	Northwest	6.4	Sunny, cloudy or rainy	Cloudy, rainy or sunny
	October	21	1017.6	1020.5	--	--	--	16.6	21.6	12.8	56	30	2.6	4.6	East	9	East-northeast	10.1	Sunny	Sunny
	October	22	1020.6	1023.5	--	--	--	16.6	21.6	11.6	63	36	2.1	4.7	East	7.3	East-southeast	9.6	Sunny	Cloudy or sunny
	October	23	1019.1	1022	1.5	1	0.5	14.6	16	12.6	85	69	2.7	4.6	Northwest	8	North-northwest	0.4	Cloudy or rainy	Cloudy, rainy or sunny
	October	24	1012.2	1015.1	0.5	0.5	0.5	17.7	22.7	13.7	81	64	2.2	4.6	Northwest	7.7	Northwest	5.8	Cloudy or sunny	Sunny or cloudy
	October	25	1015.4	1018.2	--	--	--	18.1	22.4	14	62	39	2.3	4.5	East	7.5	East	9.4	Sunny	Sunny or cloudy
	October	26	1017.2	1020.1	0	0	0	18	21.6	14.8	68	54	2.3	4.2	Southeast	6.8	Southeast	2.6	Cloudy or sunny	Cloudy or rainy
	October	27	1005.1	1007.9	12	4	1	19.1	24.4	15.9	90	68	2.1	5.8	South-southwest	10.5	South-southwest	3.7	Cloudy, rainy or sunny	Sunny or cloudy
	October	28	1006.3	1009.2	--	--	--	16.9	21.1	13.9	73	57	2.2	4.2	Northwest	6.6	East	3	Cloudy or sunny	Sunny
	October	29	1006.1	1008.9	--	--	--	17	22.2	12.2	74	44	2.4	4.9	North-northeast	7.7	North-northeast	9.7	Sunny	Sunny
	October	30	1007.9	1010.7	--	--	--	17	22.9	11.8	62	36	2.3	5.2	Northwest	8.7	Northwest	8.6	Sunny	Sunny or cloudy
	October	31	1010.8	1013.7	--	--	--	15	19.9	11.9	50	31	2.6	4.7	Northwest	8.7	North-northwest	5.5	Cloudy or sunny	Cloudy or sunny
